# Supplementary material for: Agostic deformations based on electron delocalization in the alkyllithium-complex [{2-(Me3Si)2CLiC5H4N }2Electronic supplementary information (ESI) available: experimental and theoretical details of multipole refinements and model systems. See http://www.rsc.org/suppdata/cc/b1/b105452j/
Source: Royal Society of Chemistry journal article supplement (doi:10.1039/b105452j), 2001-10-01
Supplement: b105452j(2).pdf [file b105452j%282%29.pdf]

**S2: Topological analysis and geometrical parameters of  $[\{2-(\text{Me}_3\text{Si})_2\text{C}(\text{Li})\text{C}_5\text{H}_4\text{N}\}_2]$ .**

| Unit     | Method <sup>a</sup> | Distance [Å] | $\rho(\mathbf{r}_c)$ [ $\text{e}/\text{Å}^3$ ] | $\nabla^2\rho(\mathbf{r}_c)$ [ $\text{e}/\text{Å}^5$ ] | Ellipticity $\epsilon$ |
|----------|---------------------|--------------|------------------------------------------------|--------------------------------------------------------|------------------------|
| Li...N_a | Experiment          | 1.9508       | 0.215(2)                                       | 5.201(2)                                               | 0.02                   |
|          | Theory              | 1.9636       | 0.24                                           | 4.76                                                   | 0.04                   |
| Li-C1    | Experiment          | 2.2049       | 0.150(2)                                       | 2.521(1)                                               | 0.12                   |
|          | Theory              | 2.1757       | 0.19                                           | 2.52                                                   | 0.11                   |
| C1-Si2   | Experiment          | 1.8592(4)    | 0.859(14)                                      | 1.73(3)                                                | 0.13                   |
|          | Theory              | 1.8819       | 0.80                                           | 3.16                                                   | 0.11                   |
| C1-Si1   | Experiment          | 1.8552(4)    | 0.756(15)                                      | 4.25(3)                                                | 0.19                   |
|          | Theory              | 1.8798       | 0.78                                           | 3.16                                                   | 0.12                   |
| C1-C11   | Experiment          | 1.4798(5)    | 1.78(2)                                        | -11.29(5)                                              | 0.12                   |
|          | Theory              | 1.4783       | 1.73                                           | -13.38                                                 | 0.11                   |
| Si1-C2   | Experiment          | 1.8804(6)    | 0.693(17)                                      | 4.63(3)                                                | 0.22                   |
|          | Theory              | 1.9050       | 0.79                                           | 2.92                                                   | 0.01                   |
| Si1-C3   | Experiment          | 1.8930(8)    | 0.758(14)                                      | 2.73(3)                                                | 0.20                   |
|          | Theory              | 1.9197       | 0.76                                           | 2.99                                                   | 0.01                   |
| Si1-C4   | Experiment          | 1.8781(7)    | 0.765(16)                                      | 4.23(3)                                                | 0.14                   |
|          | Theory              | 1.9023       | 0.79                                           | 3.01                                                   | 0.01                   |
| Si2-C5   | Experiment          | 1.8811(5)    | 0.714(16)                                      | 5.39(3)                                                | 0.12                   |
|          | Theory              | 1.9083       | 0.78                                           | 2.91                                                   | 0.01                   |
| Si2-C6   | Experiment          | 1.8888(6)    | 0.735(16)                                      | 4.41(3)                                                | 0.07                   |
|          | Theory              | 1.9094       | 0.78                                           | 2.89                                                   | 0.02                   |
| Si2-C7   | Experiment          | 1.8947(7)    | 0.717(16)                                      | 3.84(3)                                                | 0.03                   |
|          | Theory              | 1.9180       | 0.76                                           | 2.97                                                   | 0.01                   |

<sup>a</sup> the experimental values were obtained by multipole refinement of the experimental charge density (see S1), the theoretical calculations were performed at the B3LYP/6-311G(3d, 3p)//B3LYP/6-31G(d) level of theory.

| Unit    | Method <sup>a</sup> | Distance [Å] | $\rho(\mathbf{r}_c)$ [ $e/\text{Å}^3$ ] | $\nabla^2\rho(\mathbf{r}_c)$ [ $e/\text{Å}^5$ ] | Ellipticity $\varepsilon$ |
|---------|---------------------|--------------|-----------------------------------------|-------------------------------------------------|---------------------------|
| N–C11   | Experiment          | 1.3636(6)    | 2.17(3)                                 | –17.34(13)                                      | 0.23                      |
|         | Theory              | 1.3729       | 2.16                                    | –22.96                                          | 0.10                      |
| C11–C12 | Experiment          | 1.4168(6)    | 2.06(2)                                 | –16.48(5)                                       | 0.21                      |
|         | Theory              | 1.4223       | 2.01                                    | –18.88                                          | 0.18                      |
| C12–C13 | Experiment          | 1.3834(7)    | 2.165(19)                               | –19.03(4)                                       | 0.23                      |
|         | Theory              | 1.3846       | 2.13                                    | –21.06                                          | 0.21                      |
| C13–C14 | Experiment          | 1.3948(7)    | 2.133(19)                               | –18.090(0)                                      | 0.24                      |
|         | Theory              | 1.4000       | 2.07                                    | –20.04                                          | 0.17                      |
| C14–C15 | Experiment          | 1.3821(7)    | 2.20(3)                                 | –20.68(6)                                       | 0.24                      |
|         | Theory              | 1.3858       | 2.13                                    | –21.20                                          | 0.23                      |
| N–C15   | Experiment          | 1.3454(7)    | 2.39(3)                                 | –22.34(12)                                      | 0.22                      |
|         | Theory              | 1.3450       | 2.27                                    | –24.80                                          | 0.13                      |
| C7–H7c  | Experiment          | 1.0981       | 1.71(4)                                 | –12.85(11)                                      | 0.08                      |
|         | Theory              | 1.1009       | 1.78                                    | –20.03                                          | 0.03                      |
| C3–H3b  | Experiment          | 1.1003       | 1.73(5)                                 | –13.01(17)                                      | 0.05                      |
|         | Theory              | 1.0974       | 1.81                                    | –20.78                                          | 0.03                      |
| C3–H3c  | Experiment          | 1.0919       | 1.65(4)                                 | –12.64(11)                                      | 0.08                      |
|         | Theory              | 1.1001       | 1.79                                    | –20.25                                          | 0.03                      |
| C3–Li_a | Experiment          | 2.5107       | 0.082(1)                                | 0.828(1)                                        | 0.69                      |
|         | Theory              | 2.4793       | 0.06                                    | 1.30                                            | 0.98                      |

<sup>a</sup> the experimental values were obtained by multipole refinement of the experimental charge density (see S1), the theoretical calculations were performed at the B3LYP/6–311G(3d, 3p)//B3LYP/6–31G(d) level of theory.

#### Selected angles [deg] for $[\{2-(\text{Me}_3\text{Si})_2\text{C}(\text{Li})\text{C}_5\text{H}_4\text{N}\}_2]_2$ .<sup>a</sup>

|            |            |        |            |            |        |
|------------|------------|--------|------------|------------|--------|
| C1–Li–N_a  | Experiment | 145.90 | Li_a–N–C11 | Experiment | 104.12 |
|            | Theory     | 142.9  |            | Theory     | 110.4  |
| Li_a–Li–C1 | Experiment | 65.55  | Li–C1–Si1  | Experiment | 104.51 |
|            | Theory     | 70.6   |            | Theory     | 105.1  |
| Li–Li_a–N  | Experiment | 104.46 | Li–C1–Si2  | Experiment | 88.92  |
|            | Theory     | 95.7   |            | Theory     | 90.6   |
| Li_a–N–C15 | Experiment | 135.39 | Li–C1–C11  | Experiment | 123.15 |
|            | Theory     | 128.6  |            | Theory     | 116.5  |

<sup>a</sup> the experimental values were obtained by multipole refinement of the experimental charge density (see S1), the theoretical calculations were performed at the B3LYP/6–311G(3d, 3p)//B3LYP/6–31G(d) level of theory.
