# Supplementary material for: Agostic deformations based on electron delocalization in the alkyllithium-complex [{2-(Me3Si)2CLiC5H4N }2Electronic supplementary information (ESI) available: experimental and theoretical details of multipole refinements and model systems. See http://www.rsc.org/suppdata/cc/b1/b105452j/
Source: Royal Society of Chemistry journal article supplement (doi:10.1039/b105452j), 2001-10-01
Supplement: b105452j(3a).pdf [file b105452j%283a%29.pdf]

**S3a: Fractional atomic coordinates and mean-square atomic displacement parameters for the non-hydrogen atoms.**

| Atom  | Fractional atomic coordinates |              |              | Mean-square atomic displacement parameters [Å <sup>2</sup> ] |             |             |              |              |              |
|-------|-------------------------------|--------------|--------------|--------------------------------------------------------------|-------------|-------------|--------------|--------------|--------------|
|       | x/a                           | y/b          | z/c          | U11                                                          | U22         | U33         | U12          | U13          | U23          |
| Si(2) | 0.302283(9)                   | 0.263099(13) | -0.086250(9) | 0.01521(4)                                                   | 0.01959(5)  | 0.02321(5)  | -0.00064(3)  | -0.00003(3)  | -0.00526(4)  |
| Si(1) | 0.360087(10)                  | 0.364467(12) | 0.142651(9)  | 0.01713(4)                                                   | 0.02092(5)  | 0.01712(4)  | 0.00037(4)   | -0.00047(3)  | 0.00369(4)   |
| N     | 0.32170(4)                    | 0.65175(5)   | 0.01422(4)   | 0.01575(14)                                                  | 0.01575(16) | 0.02033(15) | 0.00046(12)  | -0.00024(12) | -0.00178(13) |
| C(1)  | 0.34445(3)                    | 0.40747(4)   | 0.00109(3)   | 0.01391(12)                                                  | 0.01611(14) | 0.01614(13) | 0.00126(11)  | 0.00004(10)  | -0.00010(11) |
| C(2)  | 0.21836(5)                    | 0.35769(7)   | 0.20396(4)   | 0.0262(2)                                                    | 0.0590(4)   | 0.02440(18) | 0.0003(2)    | 0.00801(16)  | 0.0090(2)    |
| C(3)  | 0.44800(8)                    | 0.49177(8)   | 0.22359(5)   | 0.0428(3)                                                    | 0.0346(3)   | 0.01996(19) | -0.0082(3)   | -0.0073(2)   | -0.0005(2)   |
| C(4)  | 0.43410(5)                    | 0.19839(7)   | 0.16947(5)   | 0.0370(3)                                                    | 0.0277(2)   | 0.0389(3)   | 0.0071(2)    | -0.0079(2)   | 0.01062(19)  |
| C(5)  | 0.25199(5)                    | 0.31911(7)   | -0.22208(4)  | 0.0315(2)                                                    | 0.0485(3)   | 0.02199(18) | -0.0046(2)   | -0.00559(16) | -0.00591(19) |
| C(6)  | 0.18768(5)                    | 0.14550(5)   | -0.04195(5)  | 0.02615(19)                                                  | 0.02222(18) | 0.0453(3)   | -0.00720(16) | 0.00334(18)  | -0.00462(17) |
| C(7)  | 0.43079(6)                    | 0.15207(8)   | -0.10675(7)  | 0.0243(2)                                                    | 0.0278(3)   | 0.0458(3)   | 0.0046(2)    | 0.0023(2)    | -0.0152(3)   |
| C(11) | 0.27294(3)                    | 0.53035(4)   | -0.01261(3)  | 0.01226(12)                                                  | 0.01619(14) | 0.01658(13) | 0.00037(11)  | 0.00075(10)  | 0.00121(11)  |
| C(12) | 0.15600(4)                    | 0.52954(5)   | -0.04788(4)  | 0.01265(12)                                                  | 0.01972(16) | 0.0349(2)   | 0.00008(11)  | -0.00214(12) | 0.00216(13)  |
| C(13) | 0.09272(4)                    | 0.64778(5)   | -0.05310(4)  | 0.01447(13)                                                  | 0.02391(19) | 0.0407(2)   | 0.00346(13)  | -0.00146(14) | 0.00497(16)  |
| C(14) | 0.14460(4)                    | 0.77001(5)   | -0.02328(4)  | 0.01988(16)                                                  | 0.01992(17) | 0.03251(19) | 0.00554(13)  | 0.00302(13)  | 0.00352(14)  |
| C(15) | 0.25923(4)                    | 0.76603(5)   | 0.00900(3)   | 0.02103(16)                                                  | 0.01679(16) | 0.02521(17) | 0.00222(14)  | 0.00148(12)  | -0.00099(12) |
| Li    | 0.519190                      | 0.392970     | -0.052800    | 0.015314                                                     | 0.040846    | 0.029042    | 0.002015     | 0.001001     | -0.001989    |
