# Supplementary material for: Agostic deformations based on electron delocalization in the alkyllithium-complex [{2-(Me3Si)2CLiC5H4N }2Electronic supplementary information (ESI) available: experimental and theoretical details of multipole refinements and model systems. See http://www.rsc.org/suppdata/cc/b1/b105452j/
Source: Royal Society of Chemistry journal article supplement (doi:10.1039/b105452j), 2001-10-01
Supplement: b105452j(3b).pdf [file b105452j%283b%29.pdf]

**S3b: Fractional atomic coordinates and mean-square atomic displacement parameters for the hydrogen atoms.**

| Atom  | Fractional atomic coordinates |          |           | Mean-square atomic displacement parameters [ $\text{\AA}^2$ ] |          |          |           |           |           |
|-------|-------------------------------|----------|-----------|---------------------------------------------------------------|----------|----------|-----------|-----------|-----------|
|       | $x/a$                         | $y/b$    | $z/c$     | $U11$                                                         | $U22$    | $U33$    | $U12$     | $U13$     | $U23$     |
| H(2a) | 0.229000                      | 0.335210 | 0.287310  | 0.067080                                                      | 0.164801 | 0.034814 | -0.003406 | 0.009672  | 0.021281  |
| H(2b) | 0.163710                      | 0.278590 | 0.168450  | 0.047008                                                      | 0.081276 | 0.079196 | -0.016445 | 0.010400  | 0.003484  |
| H(2c) | 0.171690                      | 0.452050 | 0.194260  | 0.055653                                                      | 0.081146 | 0.087919 | 0.021593  | 0.022022  | -0.000689 |
| H(3a) | 0.450260                      | 0.461780 | 0.306060  | 0.094991                                                      | 0.081263 | 0.031538 | -0.016757 | -0.015509 | 0.007878  |
| H(3b) | 0.411360                      | 0.594320 | 0.220820  | 0.096174                                                      | 0.044382 | 0.054717 | -0.000286 | -0.001248 | -0.011193 |
| H(3c) | 0.536830                      | 0.498040 | 0.202810  | 0.044499                                                      | 0.086294 | 0.065182 | -0.020605 | -0.005018 | 0.001261  |
| H(4a) | 0.442330                      | 0.182190 | 0.254950  | 0.099086                                                      | 0.069472 | 0.050050 | 0.012987  | -0.013806 | 0.023413  |
| H(4b) | 0.520350                      | 0.197010 | 0.141910  | 0.045786                                                      | 0.070382 | 0.088751 | 0.020397  | 0.000429  | 0.008541  |
| H(4c) | 0.388230                      | 0.111860 | 0.135300  | 0.082173                                                      | 0.035113 | 0.085800 | 0.000611  | -0.016757 | 0.001105  |
| H(5a) | 0.239740                      | 0.230740 | -0.272890 | 0.116987                                                      | 0.079859 | 0.050388 | -0.007358 | -0.007397 | -0.027638 |
| H(5b) | 0.311180                      | 0.383330 | -0.258120 | 0.106028                                                      | 0.134680 | 0.057291 | -0.066417 | -0.019838 | 0.035802  |
| H(5c) | 0.170370                      | 0.370720 | -0.226310 | 0.083603                                                      | 0.146861 | 0.055549 | 0.055107  | -0.017472 | -0.000637 |
| H(6a) | 0.173660                      | 0.063050 | -0.099050 | 0.073671                                                      | 0.050557 | 0.077285 | -0.022880 | 0.006214  | -0.026130 |
| H(6b) | 0.106420                      | 0.196770 | -0.036710 | 0.036673                                                      | 0.054730 | 0.118404 | 0.001027  | 0.019331  | 0.002782  |
| H(6c) | 0.210030                      | 0.099030 | 0.034400  | 0.074074                                                      | 0.062699 | 0.066157 | -0.017563 | -0.000026 | 0.016354  |
| H(7a) | 0.402480                      | 0.062230 | -0.150680 | 0.057889                                                      | 0.054730 | 0.122005 | -0.000741 | 0.003042  | -0.051857 |
| H(7b) | 0.475150                      | 0.117940 | -0.034470 | 0.066599                                                      | 0.079599 | 0.070369 | 0.035776  | -0.007059 | 0.001885  |
| H(7c) | 0.494710                      | 0.199020 | -0.154600 | 0.050544                                                      | 0.063453 | 0.088972 | 0.002964  | 0.027404  | -0.011037 |
| H(12) | 0.114500                      | 0.433840 | -0.068030 | 0.031213                                                      | 0.032019 | 0.090012 | -0.005473 | -0.010699 | -0.004979 |
| H(13) | 0.001910                      | 0.644630 | -0.080100 | 0.024466                                                      | 0.051389 | 0.091546 | 0.004589  | -0.011609 | 0.003991  |
| H(14) | 0.097350                      | 0.865670 | -0.026700 | 0.042510                                                      | 0.033111 | 0.073983 | 0.015418  | 0.003081  | 0.003926  |
| H(15) | 0.304520                      | 0.859320 | 0.031140  | 0.041054                                                      | 0.028977 | 0.069667 | -0.003393 | -0.006409 | -0.008476 |
