# Supplementary material for: Agostic deformations based on electron delocalization in the alkyllithium-complex [{2-(Me3Si)2CLiC5H4N }2Electronic supplementary information (ESI) available: experimental and theoretical details of multipole refinements and model systems. See http://www.rsc.org/suppdata/cc/b1/b105452j/
Source: Royal Society of Chemistry journal article supplement (doi:10.1039/b105452j), 2001-10-01
Supplement: b105452j(5).pdf [file b105452j%285%29.pdf]

**S5: Local coordinate systems for  $[\{2-(\text{Me}_3\text{Si})_2\text{C}(\text{Li})\text{C}_5\text{H}_4\text{N}\}_2]$  before normalization.**

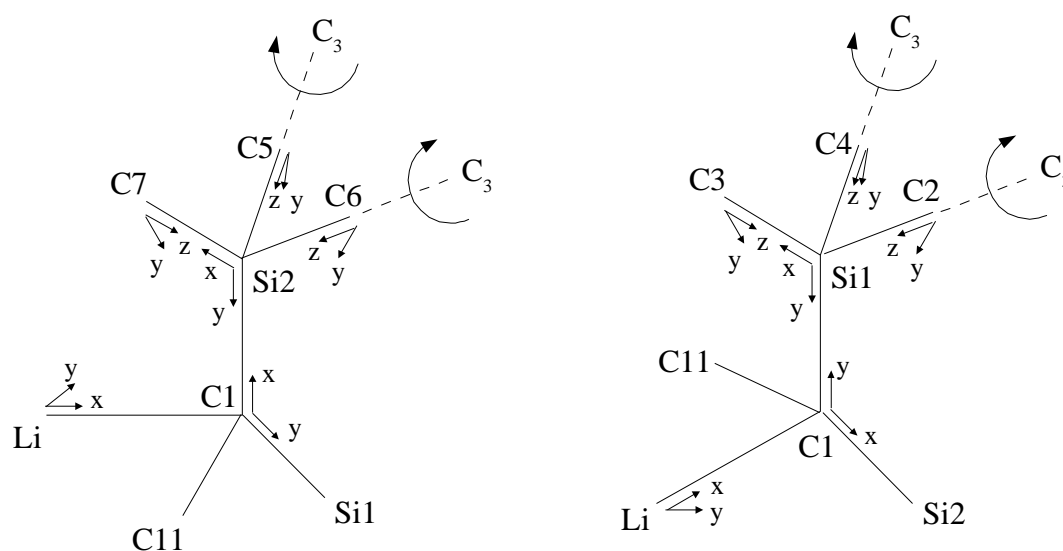

The following local coordinate systems (right handed setting) were adapted:

Li [x axis:  $\text{Li} \rightarrow \text{C1}$ ; y axis:  $\text{Li} \rightarrow \text{Si2}$ ], C1 [x axis:  $\text{C1} \rightarrow \text{Si2}$ ; y axis:  $\text{C1} \rightarrow \text{Si1}$ ], Si2 [x axis:  $\text{Si2} \rightarrow \text{C7}$ ; y axis:  $\text{Si2} \rightarrow \text{C1}$ ], Si1 [x axis:  $\text{Si1} \rightarrow \text{C3}$ ; y axis:  $\text{Si1} \rightarrow \text{C1}$ ], C2 [z axis:  $\text{C2} \rightarrow \text{Si1}$ ; y axis:  $\text{C2} \rightarrow \text{C1}$ ], C3 [z axis:  $\text{C3} \rightarrow \text{Si1}$ ; y axis:  $\text{C3} \rightarrow \text{C1}$ ], C4 [z axis:  $\text{C4} \rightarrow \text{Si1}$ ; y axis:  $\text{C4} \rightarrow \text{C1}$ ], C5 [z axis:  $\text{C5} \rightarrow \text{Si2}$ ; y axis:  $\text{C5} \rightarrow \text{C1}$ ], C6 [z axis:  $\text{C6} \rightarrow \text{Si2}$ ; y axis:  $\text{C6} \rightarrow \text{C1}$ ], C7 [z axis:  $\text{C7} \rightarrow \text{Si2}$ ; y axis:  $\text{C7} \rightarrow \text{C1}$ ].

For the carbon atoms C5, C6, C2 and C4 the z-axes are oriented along the pseudo 3-fold axes.

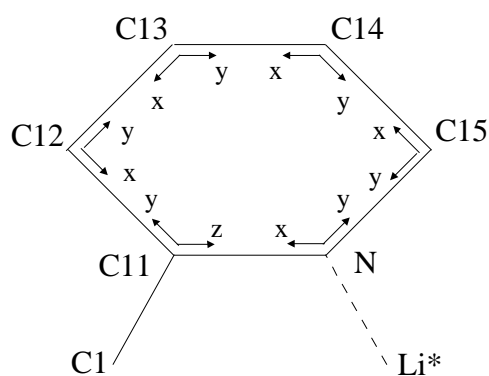

The following local coordinate systems (right handed setting) were adapted:

C11 [z axis:  $\text{C11} \rightarrow \text{N}$ ; y axis:  $\text{C11} \rightarrow \text{C12}$ ], C12 [x axis:  $\text{C12} \rightarrow \text{C11}$ ; y axis:  $\text{C12} \rightarrow \text{C13}$ ], C13 [x axis:  $\text{C13} \rightarrow \text{C12}$ ; y axis:  $\text{C13} \rightarrow \text{C14}$ ], C14 [x axis:  $\text{C14} \rightarrow \text{C13}$ ; y axis:  $\text{C14} \rightarrow \text{C15}$ ], C15 [x axis:  $\text{C15} \rightarrow \text{C14}$ ; y axis:  $\text{C15} \rightarrow \text{N}$ ], N [x axis:  $\text{N} \rightarrow \text{C11}$ ; y axis:  $\text{N} \rightarrow \text{C15}$ ].

For the carbon atoms C12, C13, C14 and C15 the z-axes are located perpendicular to a pseudo mirror plane.
