# Supplementary material for: Agostic deformations based on electron delocalization in the alkyllithium-complex [{2-(Me3Si)2CLiC5H4N }2Electronic supplementary information (ESI) available: experimental and theoretical details of multipole refinements and model systems. See http://www.rsc.org/suppdata/cc/b1/b105452j/
Source: Royal Society of Chemistry journal article supplement (doi:10.1039/b105452j), 2001-10-01
Supplement: b105452j(7b).pdf [file b105452j%287b%29.pdf]

### S7b: Geometrical and topological parameters

of the calculated model systems  $\text{SiH}_2=\text{CH}_2$ ,  $\text{SiH}_3-\text{CH}_3$  and  $\text{MeLi}$ .

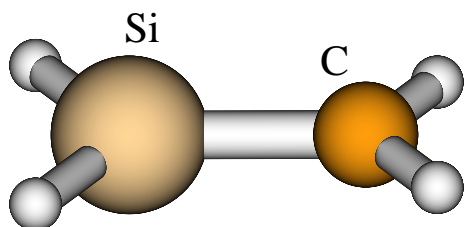

Distance [ $\text{\AA}$ ]: 1.70  
 $\rho(\mathbf{r}_c)$  [ $e/\text{\AA}^3$ ]: 1.02  
 $\nabla^2\rho(\mathbf{r}_c)$  [ $e/\text{\AA}^5$ ]: 10.43  
Ellipticity: 0.49

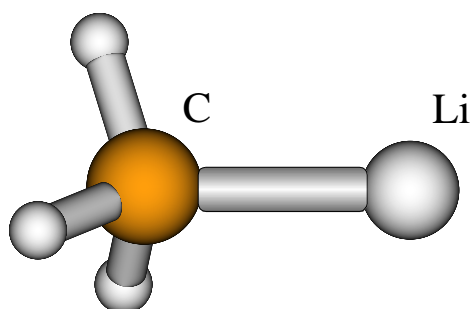

Distance [ $\text{\AA}$ ]: 1.97  
 $\rho(\mathbf{r}_c)$  [ $e/\text{\AA}^3$ ]: 0.30  
 $\nabla^2\rho(\mathbf{r}_c)$  [ $e/\text{\AA}^5$ ]: 4.83  
Ellipticity: 0.00

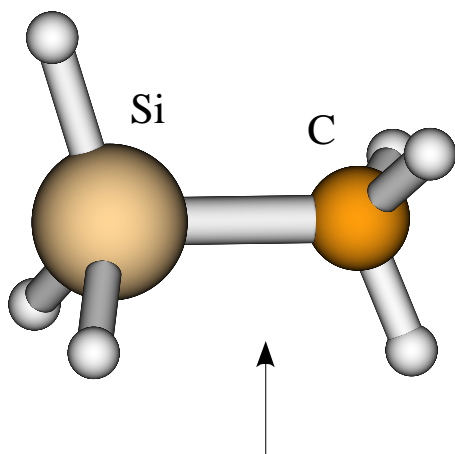

Distance [ $\text{\AA}$ ]: 1.88  
 $\rho(\mathbf{r}_c)$  [ $e/\text{\AA}^3$ ]: 0.82  
 $\nabla^2\rho(\mathbf{r}_c)$  [ $e/\text{\AA}^5$ ]: 3.28  
Ellipticity: 0.00
