# Supplementary material for: Agostic deformations based on electron delocalization in the alkyllithium-complex [{2-(Me3Si)2CLiC5H4N }2Electronic supplementary information (ESI) available: experimental and theoretical details of multipole refinements and model systems. See http://www.rsc.org/suppdata/cc/b1/b105452j/
Source: Royal Society of Chemistry journal article supplement (doi:10.1039/b105452j), 2001-10-01
Supplement: b105452j(8).pdf [file b105452j%288%29.pdf]

## S8: Comparison of multipole models for $[\{2-(\text{Me}_3\text{Si})_2\text{C}(\text{Li})\text{C}_5\text{H}_4\text{N}\}_2]$ with different flexibility.

- **Model 1:**

as described in S1 and S2

- **Model 2:**

as Model 1 but without chemical constraints and without imposing selection picking rules for the multipoles.

### Topological analysis and geometrical parameters of the agostic fragment

| Unit            | Distance [ $\text{\AA}$ ] | $\rho(\mathbf{r}_c)$ [ $\text{e}/\text{\AA}^3$ ] | $\nabla^2\rho(\mathbf{r}_c)$ [ $\text{e}/\text{\AA}^5$ ] | Ellipticity $\varepsilon$ |
|-----------------|---------------------------|--------------------------------------------------|----------------------------------------------------------|---------------------------|
| Li $\cdots$ N_a | 1.9509                    | 0.210(2)                                         | 5.202(2)                                                 | 0.02                      |
| Li–C1           | 2.2050                    | 0.142(2)                                         | 2.515(1)                                                 | 0.10                      |
| C1–Si2          | 1.8592(4)                 | 0.855(15)                                        | 1.83(3)                                                  | 0.17                      |
| Si2–C7          | 1.8946(6)                 | 0.686(17)                                        | 4.81(3)                                                  | 0.04                      |
| C7–H7c          | 1.0981                    | 1.72(5)                                          | –13.06(11)                                               | 0.09                      |

- **Model 3:**

as Model 1 but with hexadecapole refinement, in addition.

### Topological analysis and geometrical parameters of the agostic fragment

| Unit            | Distance [ $\text{\AA}$ ] | $\rho(\mathbf{r}_c)$ [ $\text{e}/\text{\AA}^3$ ] | $\nabla^2\rho(\mathbf{r}_c)$ [ $\text{e}/\text{\AA}^5$ ] | Ellipticity $\varepsilon$ |
|-----------------|---------------------------|--------------------------------------------------|----------------------------------------------------------|---------------------------|
| Li $\cdots$ N_a | 1.9510                    | 0.210(4)                                         | 5.110(4)                                                 | 0.06                      |
| Li–C1           | 2.2049                    | 0.147(4)                                         | 2.449(3)                                                 | 0.33                      |
| C1–Si2          | 1.8591(4)                 | 0.870(17)                                        | 1.93(3)                                                  | 0.24                      |
| Si2–C7          | 1.8940(6)                 | 0.733(18)                                        | 4.97(3)                                                  | 0.08                      |
| C7–H7c          | 1.0981                    | 1.74(5)                                          | –15.81(15)                                               | 0.10                      |
