# Supplementary material for: Agostic deformations based on electron delocalization in the alkyllithium-complex [{2-(Me3Si)2CLiC5H4N }2Electronic supplementary information (ESI) available: experimental and theoretical details of multipole refinements and model systems. See http://www.rsc.org/suppdata/cc/b1/b105452j/
Source: Royal Society of Chemistry journal article supplement (doi:10.1039/b105452j), 2001-10-01
Supplement: b105452j(9).pdf [file b105452j%289%29.pdf]

## S9: Analysis of the Experimental Charge Density

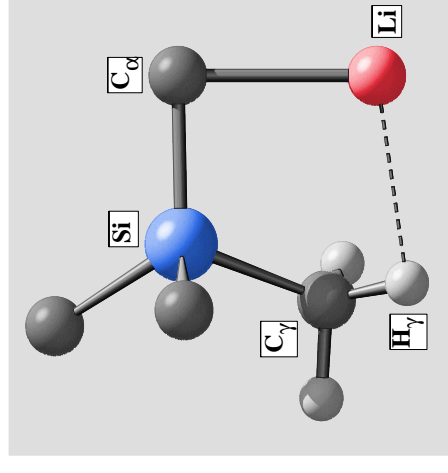

*valence shell  
charge concentrations*

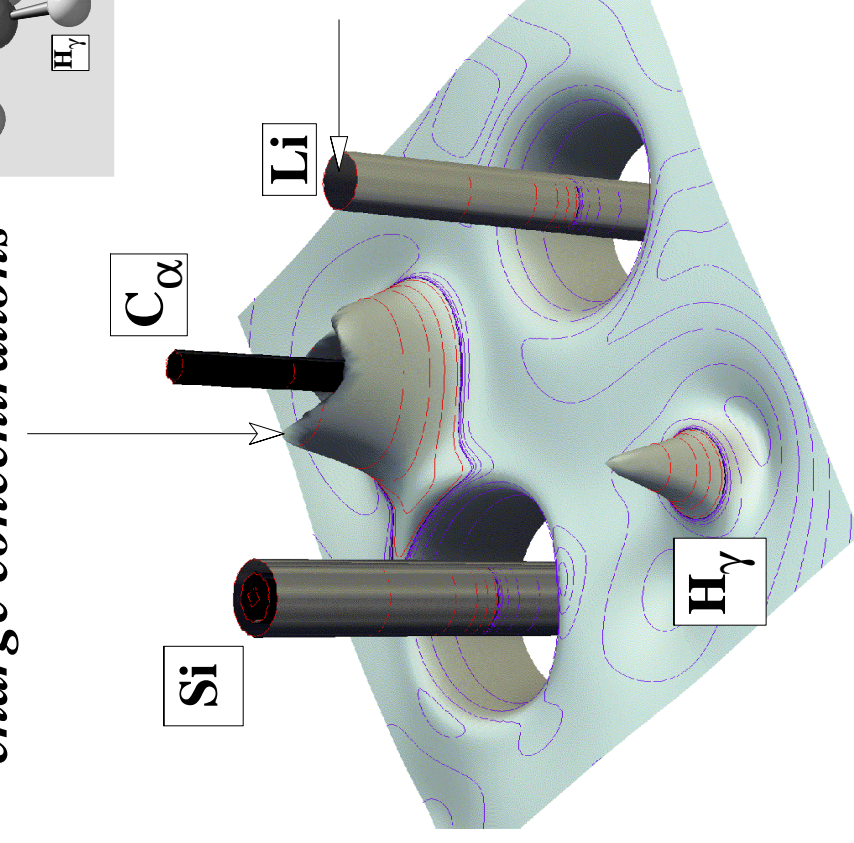

Relief map of the negative  
of the *Laplacian*  $-\nabla^2\rho(r)$

*saddle point*

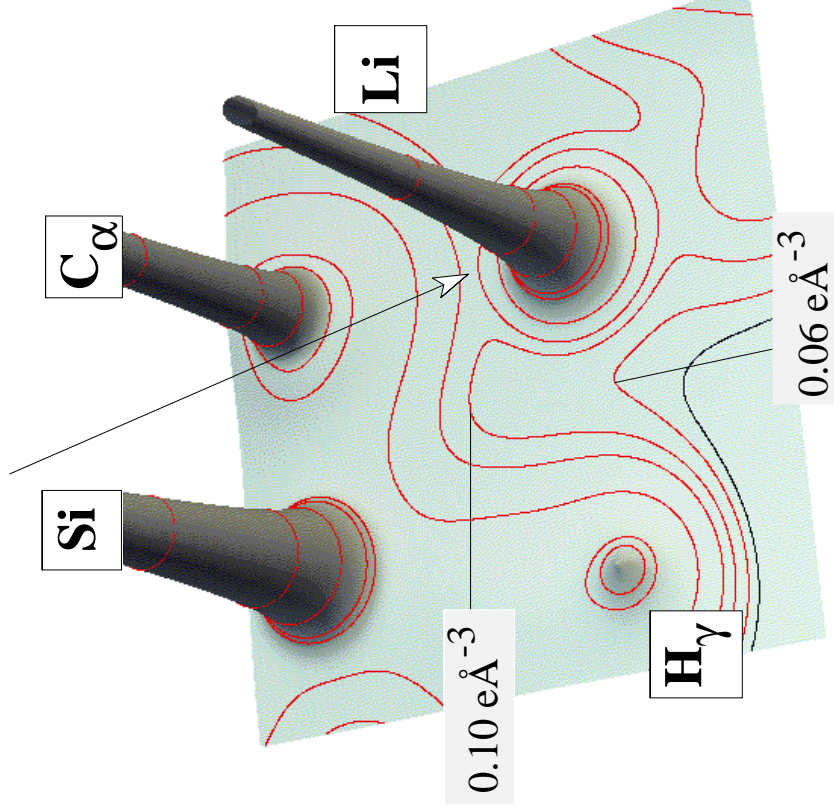

Relief map of the  
*total electron density*  $\rho(r)$
